# Supplementary material for: A Scoping Review of Observational Studies on Food and Beverage Advertising on Social Media: A Public Health Perspective
Source: MDPI journal article supplement (doi:10.3390/ijerph20043615), 2023-02-17
Supplement: s1 [file s1]

**Supplementary material S3.** Assessment of risk for bias.

| Author (year)                            | Selection: (Maximum 5 stars) |                        |                                |                            | Outcome:<br>(Maximum 2 stars) | Total Score<br>(Maximum 7 stars) |
|------------------------------------------|------------------------------|------------------------|--------------------------------|----------------------------|-------------------------------|----------------------------------|
|                                          | Sample representativeness    | Sample analysis period | Identification of the exposure | Definition of the exposure | Assessment of the outcome     |                                  |
| Freeman et al. (2014)                    | *                            | *                      | **                             | *                          |                               | 5                                |
| Boelsen-Robinson et al. (2016)           | *                            |                        | **                             | *                          | **                            | 6                                |
| Confos and Davis (2016)                  | *                            |                        | **                             | *                          | **                            | 6                                |
| Austin and Gaither (2016)                | *                            | *                      | **                             | *                          | **                            | 7                                |
| Taecharungroj (2017)                     | *                            | *                      | **                             | *                          | **                            | 7                                |
| Laestadius and Wahl (2017)               | *                            |                        | **                             |                            | **                            | 5                                |
| Busse (2018)                             | *                            |                        | **                             | *                          | **                            | 6                                |
| Horta et al. (2018)                      | *                            | *                      | **                             | *                          | **                            | 7                                |
| Jayanetti et al. (2018)                  | *                            | *                      | **                             |                            |                               | 4                                |
| Tan et al. (2018)                        | *                            |                        | **                             | *                          | **                            | 6                                |
| Vassallo et al. (2018)                   | *                            | *                      | **                             | *                          | **                            | 7                                |
| Klassen et al. (2018)                    | *                            |                        | **                             | *                          | **                            | 6                                |
| Brownbill et al. (2018)                  | *                            |                        | **                             | *                          |                               | 4                                |
| Buchanan et al. (2018)                   | *                            |                        | **                             |                            | **                            | 5                                |
| Vandevijvere et al. (2018)               | *                            | *                      |                                | *                          | **                            | 5                                |
| Jaichuen et al. (2019)                   | *                            |                        | **                             | *                          | **                            | 6                                |
| Barklamb et al. (2020)                   | *                            |                        | **                             | *                          | **                            | 6                                |
| Kent et al. (2020)                       | *                            |                        |                                | *                          | **                            | 4                                |
| Bragg et al. (2020)                      | *                            | *                      | **                             | *                          | **                            | 7                                |
| Castelló-Martínez and Tur-Viñes. (2020a) | *                            | *                      |                                | *                          |                               | 3                                |
| Gerritsen et al. (2021)                  | *                            | *                      | **                             | *                          | **                            | 7                                |
| Amson et al. (2021)                      | *                            | *                      |                                | *                          | **                            | 5                                |
| Antunéz et al. (2021)                    | *                            | *                      | **                             | *                          | **                            | 7                                |
| Martino et al. (2021)                    | *                            | *                      | **                             | *                          | **                            | 7                                |
| Greene et al. (2021)                     | *                            | *                      | **                             | *                          | **                            | 7                                |

---

|                                          |   |   |   |   |
|------------------------------------------|---|---|---|---|
| Castelló-Martínez and Tur-Viñes. (2021a) | * | * | * | 3 |
|------------------------------------------|---|---|---|---|

---
